# Supplementary material for: Quasi-planar aromatic B36and B36−clusters: all-boron analogues of coronene
Source: Royal Society of Chemistry journal article supplement (doi:10.1039/c4cp02032d), 2014-07-16

## Supplementary Materials:

### Quasi-planar aromatic $B_{36}$ and $B_{36}^-$ clusters: all-boron analogues of coronene†

Qiang Chen,<sup>a</sup> Guang-Feng Wei,<sup>b</sup> Wen-Juan Tian,<sup>a</sup> Hui Bai,<sup>a</sup> Zhi-Pan Liu,<sup>b</sup>

Hua-Jin Zhai,<sup>\*ac</sup> and Si-Dian Li<sup>\*a</sup>

<sup>a</sup>*Nanocluster Laboratory, Institute of Molecular Science, Shanxi University, Taiyuan 030006, China*

<sup>b</sup>*Department of Chemistry, Fudan University, Shanghai 200433, China*

<sup>c</sup>*State Key Laboratory of Quantum Optics and Quantum Optics Devices, Shanxi University, Taiyuan 030006, China*

E-mail: hj.zhai@sxu.edu.cn (H.J.Z.); lisidian@sxu.edu.cn (S.D.L.)

**Fig. S1.** Low-lying isomers of B<sub>36</sub>, with their relative energies indicated in eV at PBE0/6-311+G\* and TPSSh/6-311+G\*(in *italic*) levels.

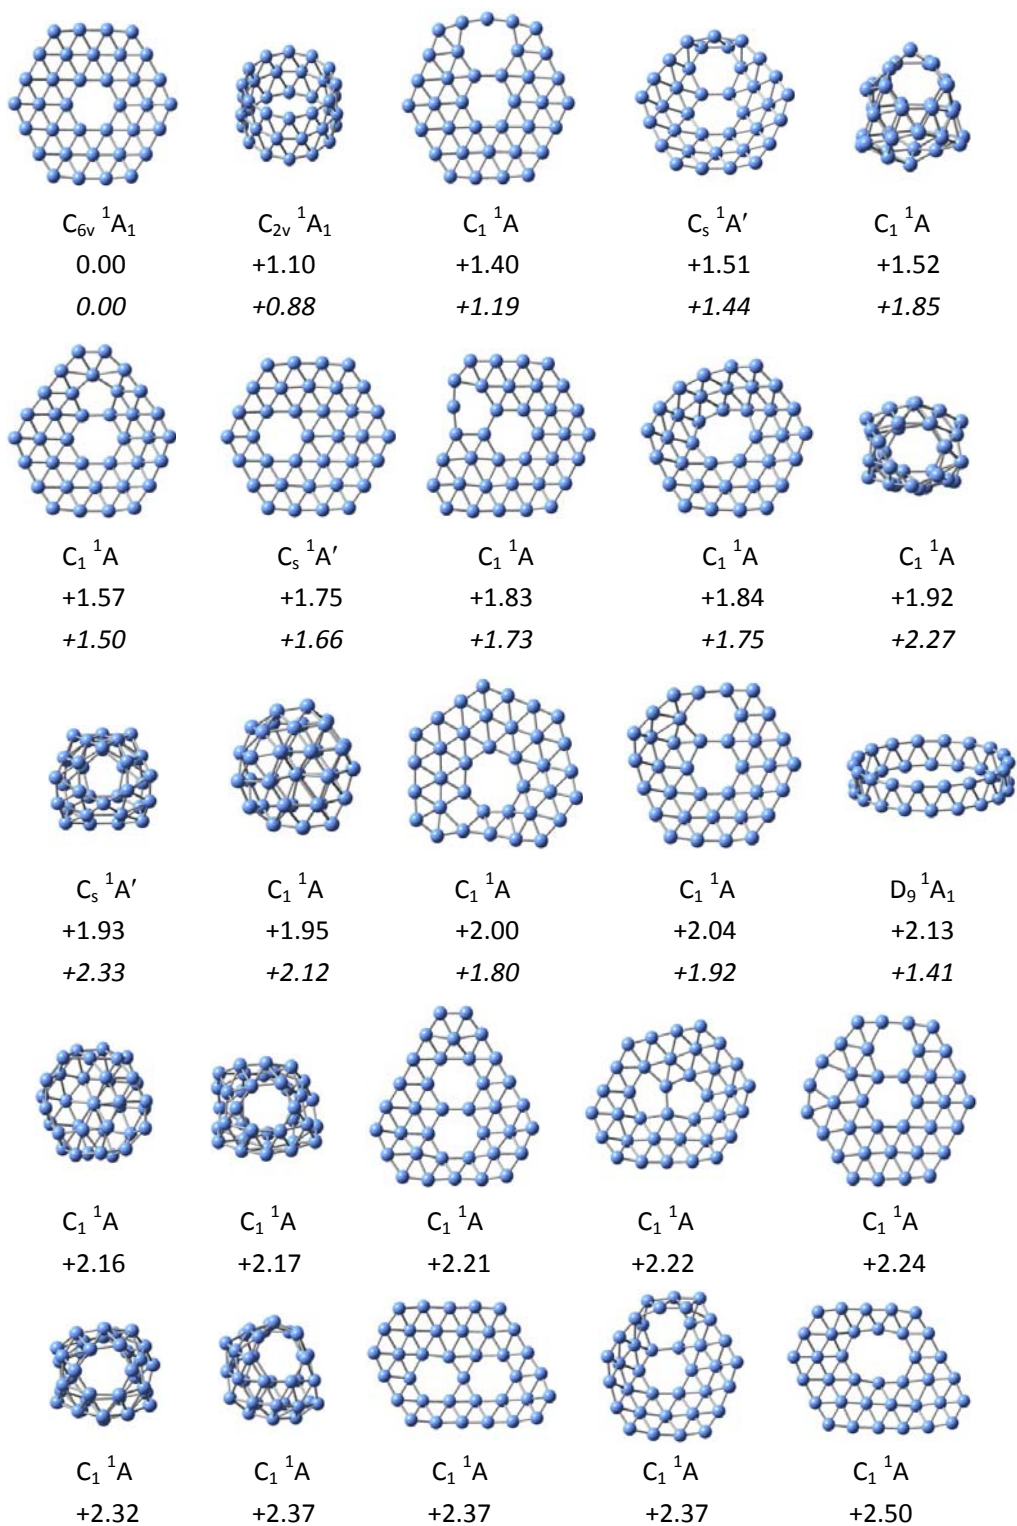

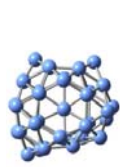

$C_1^1A$   
+2.51

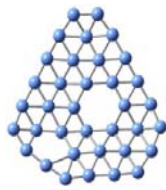

$C_1^1A$   
+2.80

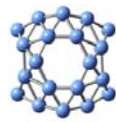

$C_{2h}^1A_g$   
+2.84  
+3.11

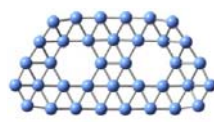

$C_s^1A'$   
+2.98

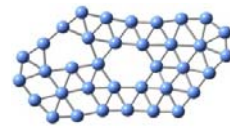

$C_1^1A$   
+3.10

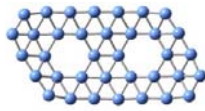

$C_1^1A$   
+3.21

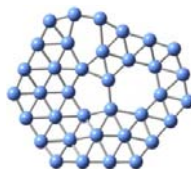

$C_1^1A$   
+3.21

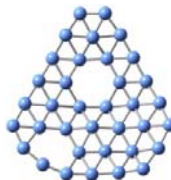

$C_1^1A$   
+3.22

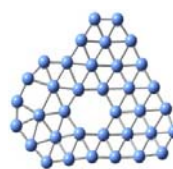

$C_1^1A$   
+3.27

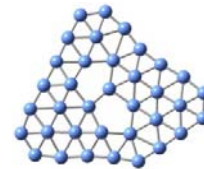

$C_1^1A$   
+3.29

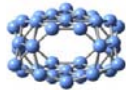

$C_i^1A_g$   
+3.35

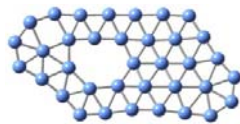

$C_1^1A$   
+3.38

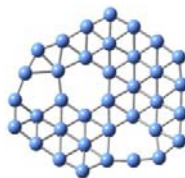

$C_1^1A$   
+3.42

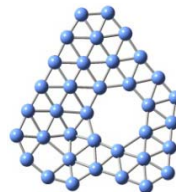

$C_1^1A$   
+3.46

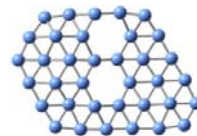

$C_1^1A$   
+3.47

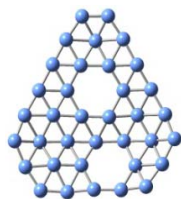

$C_1^1A$   
+3.48

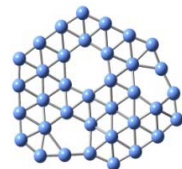

$C_1^1A$   
+3.81

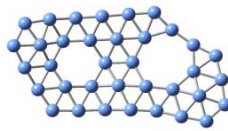

$C_1^1A$   
+3.95

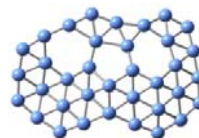

$C_1^1A$   
+4.92

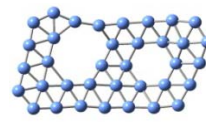

$C_1^1A$   
+4.92

**Fig. S2.** Low-lying isomers of  $B_{36}^-$ , with their relative energies indicated in eV at PBE0/6-311+G\* and TPSSh/6-311+G\*(in *italic*) levels.

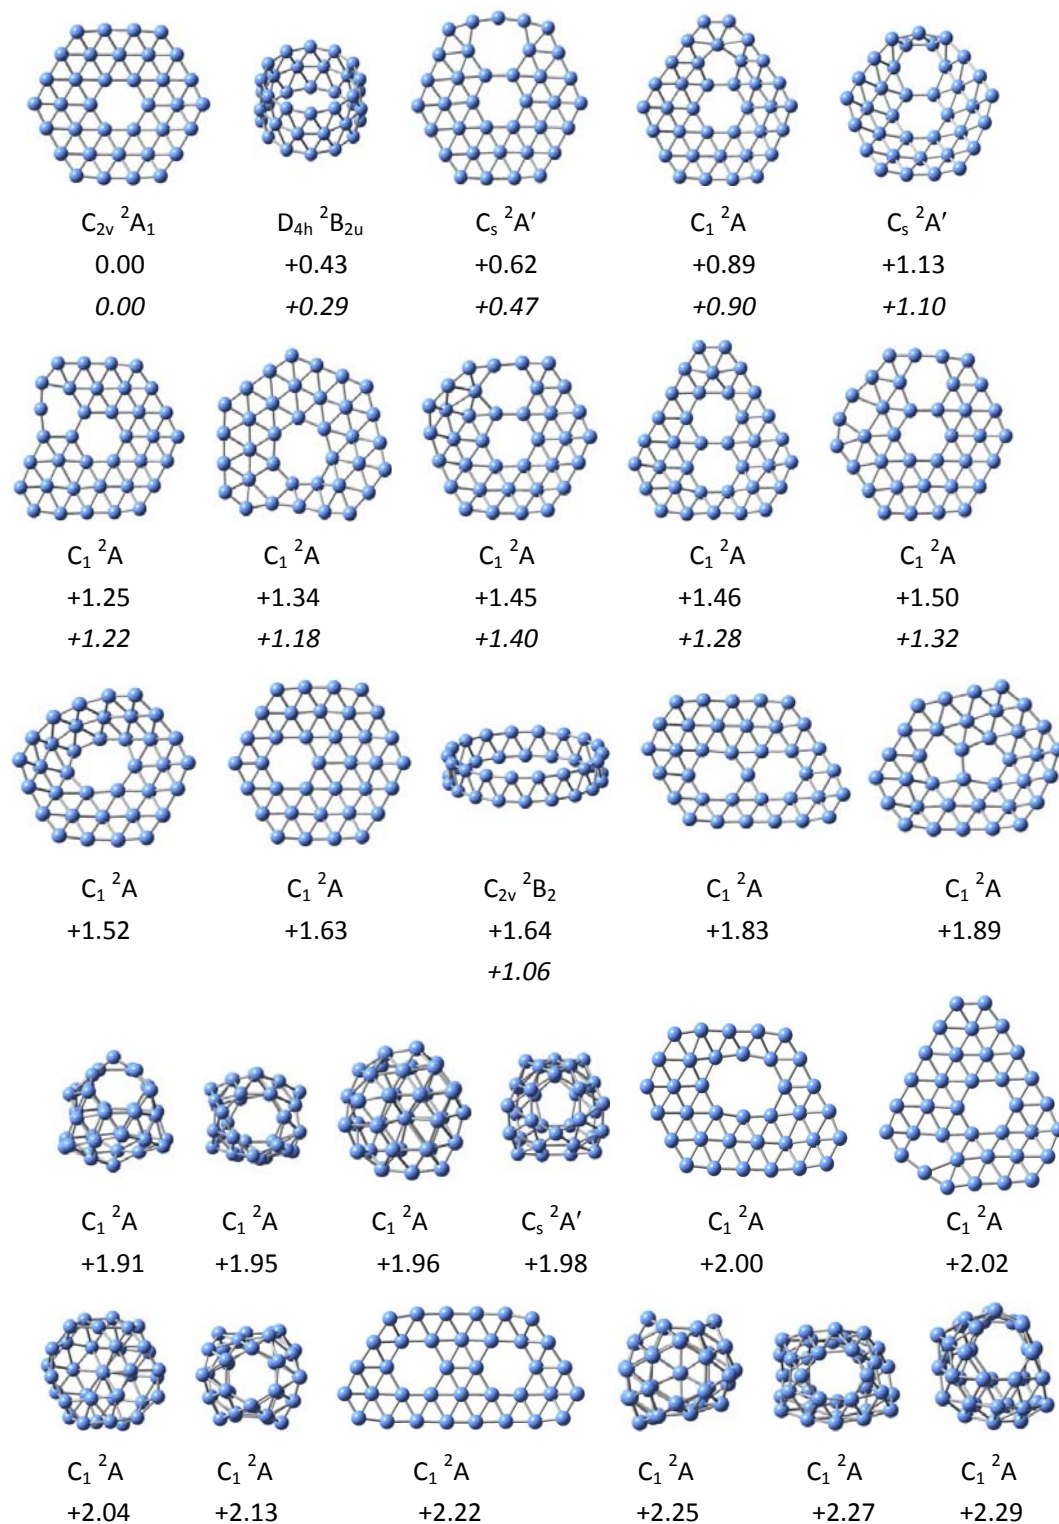

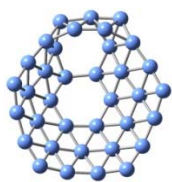

$C_1^2A$   
+2.31

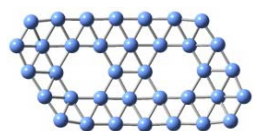

$C_2^2A$   
+2.32

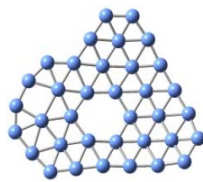

$C_1^2A$   
+2.39

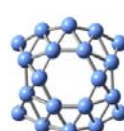

$C_{2v}^2B_1$   
+2.41  
+2.71

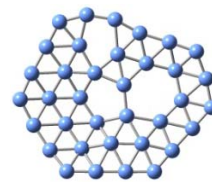

$C_1^2A$   
+2.43

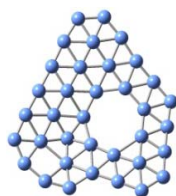

$C_1^2A$   
+2.77

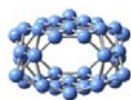

$C_{2h}^2B_g$   
+3.63

**Fig. S3.** Optimized geometries (bond lengths labeled in Å) of (a)  $C_{6v} B_{36} (^1A_1)$  and (b)  $C_{2v} B_{36}^- (^2A_1)$  at PBE0/6-311+G\* level.

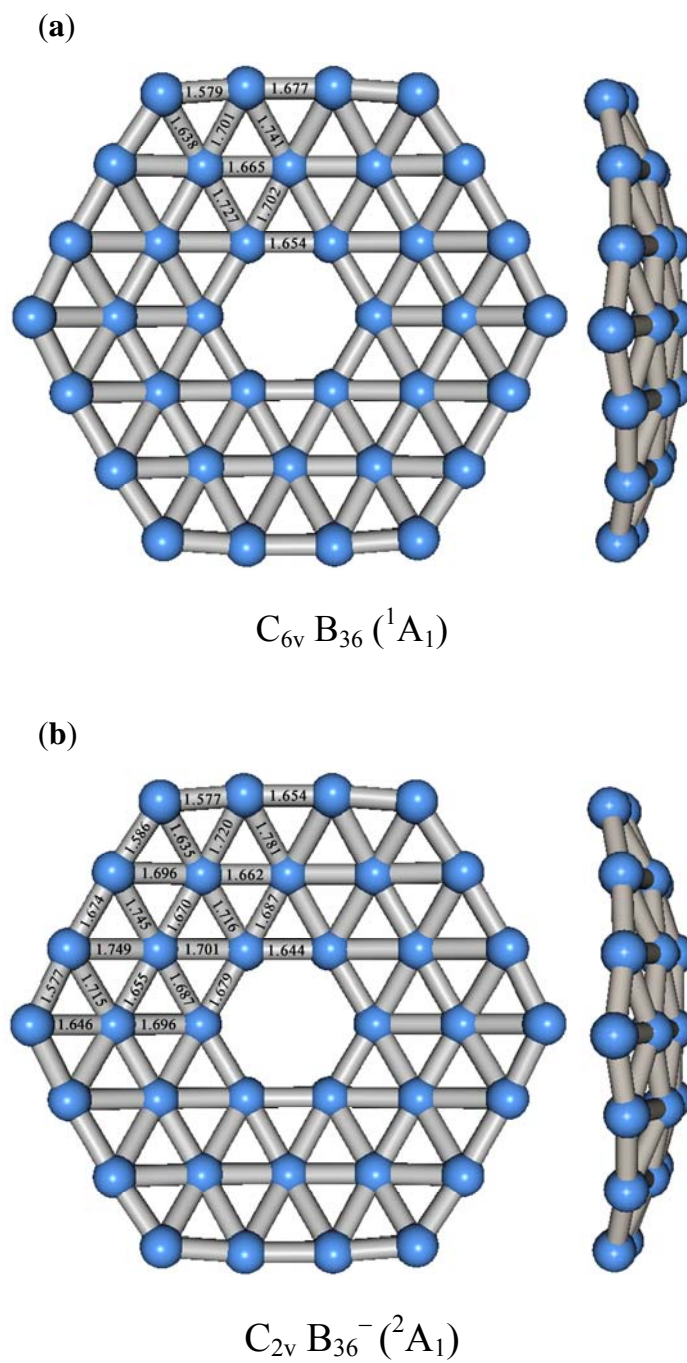

**Fig. S4.** Optimized geometries (bond lengths labeled in Å) of (a)  $C_{6v}$   $B_{36}H_6$  ( $^1A_1$ ) and (b)  $C_{2v}$   $B_{36}H_6^-$  ( $^2A_1$ ) at PBE0/6-311+G\* level.

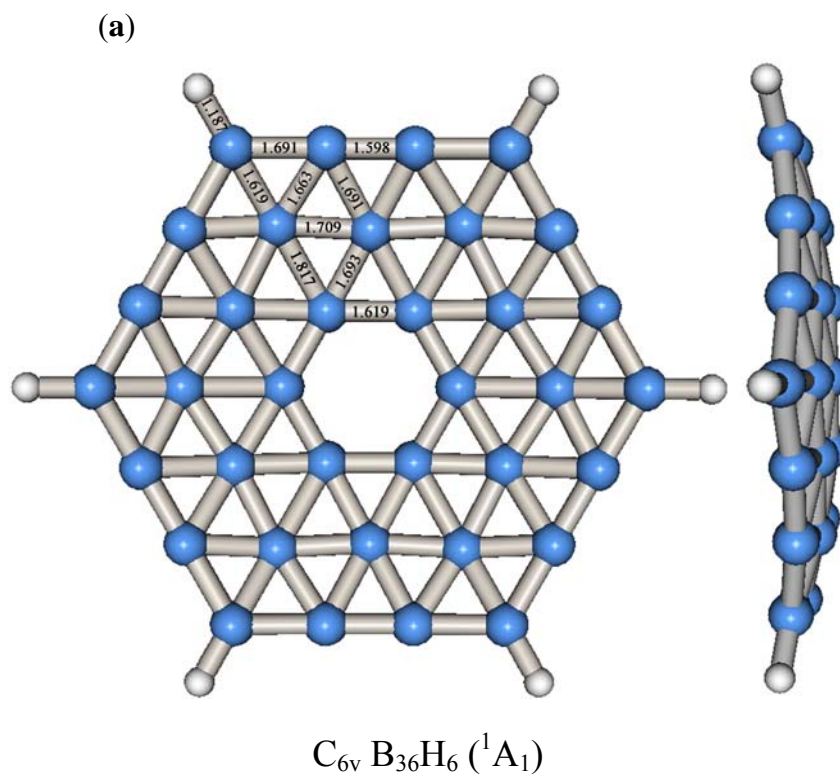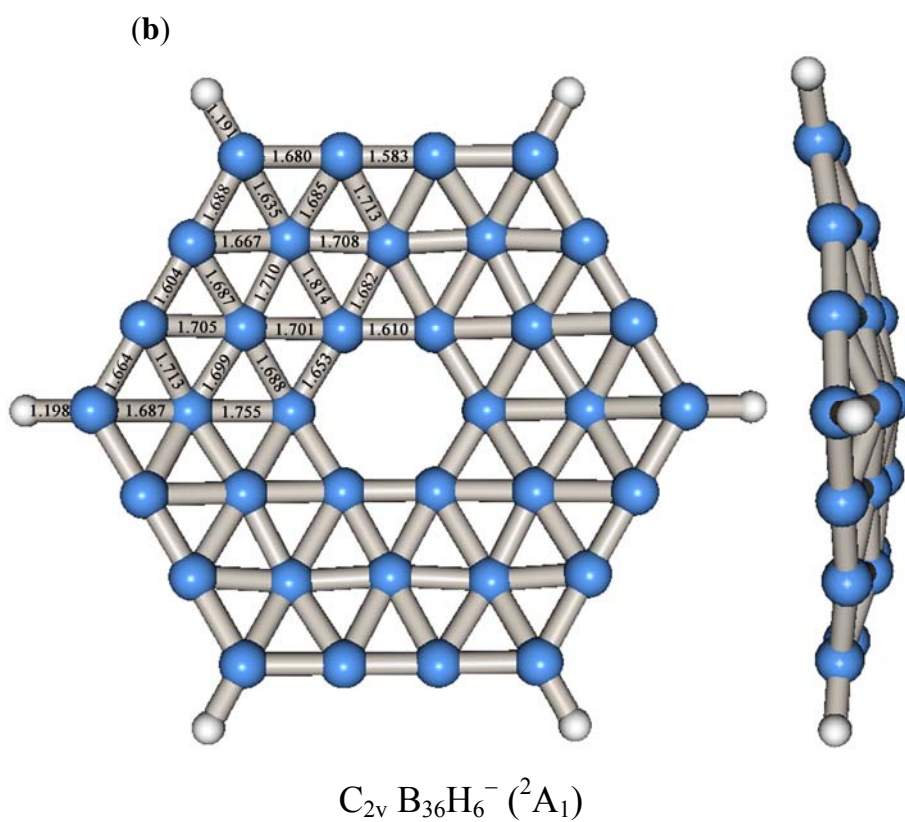

**Fig. S5.** Comparison of the  $\pi$  molecular orbitals of (a)  $C_{6v}$   $B_{36}$ , (b)  $C_{6v}$   $B_{36}H_6$ , and (c)  $D_{6h}$   $C_{24}H_{12}$ .

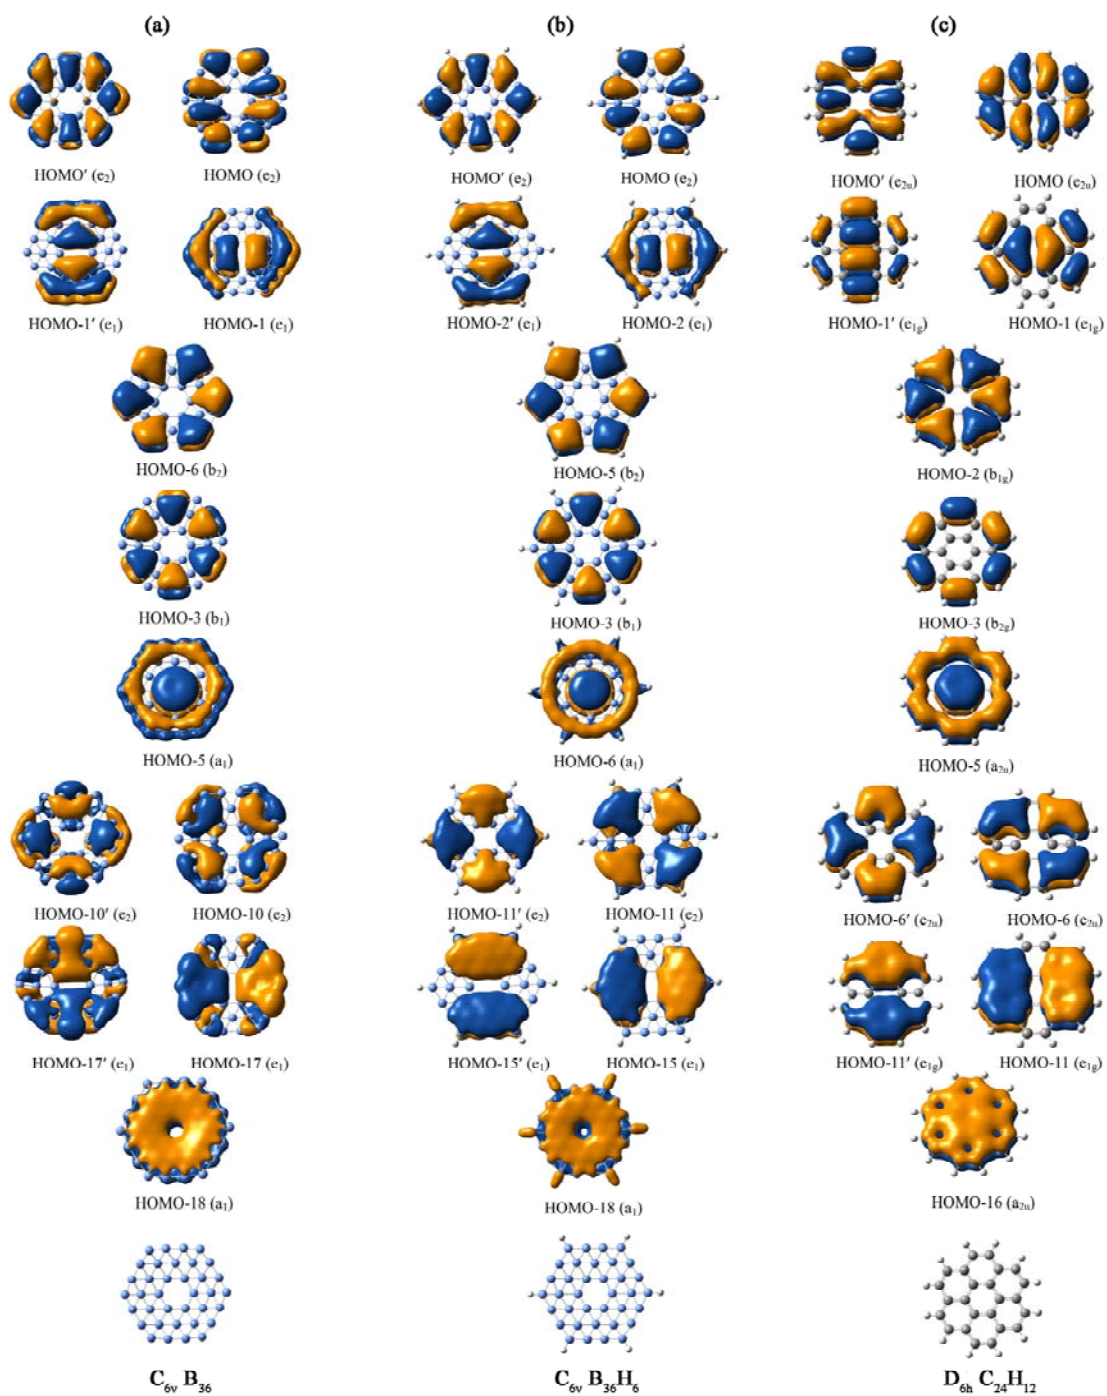

Supplement: c4cp02032d1.pdf [file c4cp02032d1.pdf]
